1 **Potential role of extracellular ATP released by bacteria in bladder infection**  
2 **and contractility**

3 Behnam Abbasian<sup>a,b</sup>, Aidan Shair<sup>a,b</sup>, David B. O’Gorman<sup>b,c</sup>, Ana M. Pena-Diaz<sup>b,c</sup>  
4 Kathleen Engelbrecht<sup>e</sup>, David W. Koenig<sup>e</sup>, Gregor Reid<sup>a,b,d</sup>, Jeremy P. Burton<sup>a,b,d</sup>

5  
6 Department of Microbiology and Immunology, The University of Western Ontario,  
7 London, Ontario, Canada<sup>a</sup>.

8 Lawson Health Research Institute, St. Joseph’s Hospital, London, Ontario,  
9 Canada<sup>b</sup>.

10 Plastic and Reconstructive Surgery, Department of Surgery, The University of  
11 Western Ontario, London, Ontario, Canada<sup>c</sup>.

12 Division of Urology, Department of Surgery, The University of Western Ontario,  
13 London, Ontario, Canada<sup>d</sup>.

14 Kimberly Clark Corporation, Global Research & Engineering, WI, USA<sup>e</sup>

15

16

17 Corresponding author: Jeremy P. Burton. [Jeremy.burton@lawsonresearch.com](mailto:Jeremy.burton@lawsonresearch.com)

18 Running title: Effects of extracellular bacterial ATP

19

20

21

22 **ABSTRACT**

23 Urgency urinary incontinence (UUI), the result of conditions such as overactive  
24 bladder (OAB), could potentially be influenced by both commensal and urinary  
25 tract infection-associated bacteria. The sensing of bladder filling involves interplay  
26 between various parts of the nervous system eventually resulting in contraction of  
27 the detrusor muscle during micturition. Here we model host responses to various  
28 urogenital bacteria, firstly by using urothelial bladder cell lines and then with  
29 myofibroblast contraction assays. To measure responses, we examined calcium  
30 influx, gene expression and alpha smooth muscle actin deposition assays. We  
31 found that organisms such as *Escherichia coli* and *Gardnerella vaginalis* strongly  
32 induced calcium influx and contraction, whereas, *Lactobacillus crispatus* and *L.*  
33 *gasseri* did not induce this response. Additionally, supernatants from lactobacilli  
34 impeded influx-and contraction induced by the uropathogens. Upon further  
35 investigation of factors associated with the purinergic signaling pathways, we  
36 found that influx and contraction of cells correlated to the amount of extracellular  
37 ATP produced by *E. coli*. Certain lactobacilli appear to mitigate this response by  
38 utilizing extracellular ATP or producing inhibitory compounds which can act as a  
39 receptor agonist or calcium channel blocker. These findings suggest that members  
40 of the urinary microbiota may be influencing UUI.

41

42

43 **IMPORTANCE**

44 The ability of the uropathogenic bacteria to release significant amounts of ATP as  
45 an excitatory compound and possible virulence factor to stimulate various  
46 signaling pathways can have profound effects on the urothelium, perhaps  
47 extending to the vagina. This may be countered by the ability of certain commensal  
48 urinary microbiota constituents, such as lactobacilli. The clinical implications are  
49 to better understand the impact of antimicrobial therapy on the urinary microbiota  
50 and to develop a more targeted approach to enhance the commensal bacteria and  
51 reduce ATP release by pathogens.

52

## 53 INTRODUCTION

54 Patients who suffer from overactive bladder syndrome (OAB) or urgency  
55 urinary incontinence (UI) usually experience the sensation to urinate whether the  
56 bladder is full or not. While there are many factors involved, ultimately it is the  
57 contraction of bladder smooth muscle cells which invokes urination [1, 2]. Storage  
58 and voiding of urine are controlled by sympathetic and parasympathetic pathways  
59 [1,3], via the adrenergic and cholinergic systems. It has been speculated that  
60 neurotransmitters with different effects and potentially originating from bacteria,  
61 may play major roles in bladder function [4, 5].

62 The discovery of a urinary microbiota has shown that diversity differs  
63 between healthy people and patients with neurogenic bladder dysfunction,  
64 interstitial cystitis, UI and sexually transmitted infections [6, 7, 8]. The microbial  
65 diversity in women with UI may be associated with severity of the condition [9].  
66 The genus *Lactobacillus* has been found more frequently in healthy subjects  
67 compared to patients with UI (60% versus 43%), while *Gardnerella* was more  
68 abundant in patients (26% versus 12% in controls) [9]. Interestingly, in some  
69 studies, *L. gasseri* is considerably more prevalent in UI patients than *L. crispatus*  
70 raising questions about how different species adapt to the bladder [9].

71 It may seem difficult to envisage how the detrusor muscle which controls  
72 micturition could be affected by bacteria present at the urothelial layer. Yet, the  
73 urothelium is only 3-5mm thick, and uropathogens have been shown to damage

74 and invade this layer [10]. Urothelial cells communicate with the sub-urethral  
75 tissue in the lamina propria, which contains nerve fibers and smooth muscle cells,  
76 by releasing excitatory compounds such as ATP [10,12]. Bacterial compounds  
77 could induce urothelial cells to release excitatory compounds into the sub-urethral  
78 space, thereby inducing smooth muscle contraction and voiding. We hypothesize  
79 that bacteria produce, release and potentially sequester compounds, such as ATP  
80 that play a role in UUI pathogenesis and that commensal bacteria may be  
81 beneficial to prevent detrusor muscle contractions.

82 Here we explore interactions of uropathogenic bacteria and commensal  
83 lactobacilli to affect the physiology of bladder cells in culture and to release ATP  
84 to stimulate calcium influx and contraction of myofibroblasts.

85

## 86 **RESULTS**

### 87 **Ca<sup>2+</sup> influx of uroepithelial cell by bacterial supernatants**

88 The supernatant of *E. coli* 1A2 was able to induce the influx of Ca<sup>2+</sup> [Fig  
89 1A]. Unlike previous reports [13], LPS did not rapidly stimulate the influx of  
90 calcium in our model [Fig 1A]. Supernatants from *E. coli* increased the levels of  
91 Ca<sup>2+</sup> influx before plateauing at the 4-hour time point. In contrast, *E. faecalis*  
92 33186 supernatant did not significantly increase the levels of Ca<sup>2+</sup> influx until the  
93 5-hour time point [Fig 1B and C].

94 ***Lactobacillus crispatus* ATCC 33820 and *Lactobacillus gasseri* KE-1**

95 **supernatants reduce  $\text{Ca}^{2+}$  influx caused by *Escherichia coli***

96 The addition of *L. crispatus* and *L. gasseri* supernatants mitigated the effects  
97 on calcium influx caused by *E. coli* supernatant up to 50% [Fig 2A-D].

98

99 **Quantification of bacterial extracellular ATP**

100 A luminescent assay was used to quantify the amount of extracellular ATP  
101 released by bacterial supernatants. The *E. coli*, *L. crispatus* and *L. gasseri*  
102 supernatants from the overnight culture contained  $0.098 \pm 0.008$  uM,  $0.024 \pm 0.003$   
103 uM and  $0.024 \pm 0.001$  uM ATP, respectively, which was significantly higher than  
104 AU  $0.0067 \pm 0.0011$  uM [Fig 3A]. In addition, supernatants of urinary microbiota  
105 constituents, *G. vaginalis* ATCC 14018 and *L. vaginalis* NCFB 2810 contained  
106  $1.30 \pm 0.14$  uM and  $0.314 \pm 0.023$  uM ATP, respectively, which was significantly  
107 greater than the AU control of  $0.0067 \pm 0.0011$  uM [Fig 3A and 3B].

108 The amount of ATP remaining when *L. crispatus* was grown in AU  
109 supplemented with 0.1 mM ATP for 24 hours was  $21.67 \pm 1.51$  uM, less than half  
110 the control ( $51.56 \pm 5.06$  uM) ( $P \leq 0.0001$ ) [Fig 3C]. To investigate ATP reduction,  
111 *L. crispatus* was cultured in AU supplemented with different concentrations of  
112 ATP, as well as in AU supplemented with 50% *E. coli* supernatant, and 25% *G.*  
113 *vaginalis* supernatant, as potential natural sources of ATP. The growth of *L.*  
114 *crispatus* was increased by increasing ATP concentration, including that emanating

115 from the *E. coli* and *G. vaginalis* supernatants [Fig 3D, F-I]. *Lactobacillus*  
116 *crispatus* also reduced the amount of ATP after overnight culture in AU  
117 supplemented with 25% of *E. coli* supernatant, and 25% of *G. vaginalis*  
118 supernatant individually. Supplementing *E. coli* with ATP had a somewhat  
119 inhibitory effect on its growth [Fig 3E]. In the presence of ATP or supernatant  
120 from *G. vaginalis*, the pH of *L. crispatus*, became further reduced (Fig 3J).

121

### 122 **Urothelial cells were forced to release ATP**

123 The urothelial cell media contained  $0.0042 \pm 0.00040$  uM ATP, and after  
124 treatment with 0.009 uM ATP for 2 minutes, the ATP released by the urothelial  
125 cells increased to  $9.237 \pm 0.172$  uM [Fig 3K].

126

### 127 **The effects of sub-therapeutic ciprofloxacin on *E. coli* to release ATP**

128 After culturing bacteria with different concentrations of ciprofloxacin from  
129 10 ug/mL to 0.031 ug/mL, the minimum inhibitory concentration (MIC) of the  
130 antibiotic against *E. coli* was 1 to 1.5 ug/mL. Using MIC concentrations of  
131 ciprofloxacin below the MIC of 0.25, 0.125, 0.0625 ug/mL induced *E. coli* to  
132 release more ATP up to  $0.0247 \pm 0.0015$  uM [Fig 4].

133

### 134 **Expression of *MAOA* and *MAOB* in the 5637 cells exposed to bacterial** 135 **supernatants**

136 ATP by increasing the level of intracellular calcium can cause mitochondrial  
137 dysfunction. Gene expression for mitochondrial enzymes, monoamine oxidase A  
138 and B was measured because of their potential ability to degrade neurotransmitters  
139 such as serotonin. The *E. coli* supernatant ( $-1.27 \pm 0.0041$  fold change), as well as  
140 *L. crispatus* supernatant ( $1.218 \pm 0.0020$  fold change) had no effect on *MAOA* gene  
141 expression [Fig 5A]. The *E. coli* had no effect on *MAOB* gene expression, whereas,  
142 *L. crispatus* upregulated its expression by 44-fold [Fig 5B].

143

#### 144 **Investigation the effect of GABA on Ca<sup>2+</sup> influx caused by ATP and bacterial** 145 **supernatant**

146 The neurotransmitter  $\gamma$ -aminobutyric acid (GABA) was found to reduce the  
147 stimulation of calcium influx caused by ATP [Fig 6A] and inhibit the stimulation  
148 of calcium influx caused by *E. coli* supernatant [Fig 6B].

149

#### 150 **Myofibroblast contraction assay**

151 A collagen contraction assay using primary myofibroblast cells seeded  
152 inside a collagen matrix was tested against bacterial products as an *in vitro* model  
153 of smooth muscle contraction. Supernatant from cultures of *E. coli* were able to  
154 induce the greatest amount of contraction ( $72.67\% \pm 0.87$ ) in the myofibroblast cell  
155 line after 24 hours and this reduced when *L. crispatus* or *L. gasseri* supernatants  
156 were added ( $48.56\% \pm 1.68$ ,  $29.82\% \pm 0.023$ , respectively) [Fig 7A, B and 7C].



157 Pure ATP caused contraction of myofibroblasts in the first hour ( $30.30\% \pm 3.25$ )  
158 and continued for 24 hours ( $60.73\% \pm 1.49$ ) [Fig 7D]. While, GABA did not cause  
159 contraction in the myofibroblast assay, it inhibited contraction caused by *E. coli*  
160 [Fig 7E]. Previous reports [13] suggest that the contraction maybe caused by *E.*  
161 *coli* was due to LPS. However, after five hours of exposure of LPS to the  
162 myofibroblasts, contraction was approximately half that induced by ATP ( $27.26\%$   
163  $\pm 1.05$  versus  $46.19 \pm 1.78\%$ ). [Fig 7F].

164

### 165 **Immunocytochemistry for intracellular alpha smooth muscle actin ( $\alpha$ -SMA)** 166 **and induction of TNF by bacteria**

167 To further confirm myofibroblast contractive abilities in the presence of  
168 bacterial compounds, the effect on alpha smooth muscle actin was assessed. The *E.*  
169 *coli* supernatant increased the intracellular image intensity ( $56.43 \pm 2.86$ ) which is  
170 related to the alpha smooth muscle actin [Fig 8A and B] and this was reduced by *L.*  
171 *crispatus* ( $13.4 \pm 1.45$ ). The *E. coli* supernatant did not increase the expression of  
172 the *ACTA2* ( $-1.037 \pm 0.023$  fold change) [Fig 8C]. *Lactobacillus crispatus* also  
173 downregulated the level of *ACTA2* gene expression ( $-1.7 \pm 0.029$  fold change) [Fig  
174 8C] Thus, the ability of *E. coli* to increase the intracellular image intensity could  
175 potentially be based on alpha smooth muscle cells contraction, and the ability of *L.*  
176 *crispatus* to reduce the intracellular image intensity could potentially be based on  
177 alpha smooth muscle cells relaxation.

178 To determine if sustained activation of the calcium channel promoted  
179 apoptosis by bacterial components, *TNF* was measured as an indicator. the *E. coli*  
180 caused more than 700-fold upregulation ( $714 \pm 19.91$ ) of *TNF* [Fig 8D], whereas,  
181 exposure to *L. crispatus* only resulted in three-fold increase ( $3.9 \pm 0.115$ ). When *E.*  
182 *coli* and *L. crispatus* supernatants were mixed and applied to the assay, the  
183 expression of *TNF* induced by the *E. coli* was strongly mitigated ( $52.38 \pm 3.98$ )  
184 [Fig 8D].

185

## 186 Discussion

187 Here we show that uropathogenic *E. coli* can release ATP into artificial urine  
188 and cause the influx of calcium [Fig 3A and 2A]. The ability to stimulate the  
189 uroepithelium could impact the sub-urethral space and smooth muscle cells and  
190 may directly affect the contractility of the bladder [14]. Studies using  
191 myofibroblasts showed that the *E. coli* supernatant induced high levels of collagen  
192 matrix contraction after 24 hours [Fig 7A/B].

193 Intracellular calcium has many roles inside the cell and regulates important  
194 mechanisms such as gene expression, metabolism, and proliferation [15]. This  
195 influx can be rapidly induced in the presence of ATP and has been previously  
196 shown to be produced extracellularly by *E. coli*, *Salmonella*,  
197 *Acinetobacter*, *Pseudomonas*, *Klebsiella* and *Staphylococcus in vitro* [12]. In  
198 patients with urinary infections, antibiotics are often administered. This reduces the

199 number of bacteria in the lumen where they are exposed to therapeutic  
200 concentrations of the antibiotic. However, bacteria can also be embedded  
201 intracellularly in the urothelial cells, where only sub-therapeutic concentration of  
202 antibiotics may reach [16]. We have now shown that subtherapeutic exposure to  
203 ciprofloxacin induced *E. coli* to release more ATP [Fig 4], which could increase  
204 bladder contractions.

205         The role that the urinary microbiota of incontinence patients might have in  
206 uncontrolled voiding is supported by the finding of an abundant member of the  
207 microbiota, *G. vaginalis* releasing comparatively large amounts of ATP ( $1.30 \pm$   
208  $0.14$  uM) [Fig3A]. If these amounts were produced *in vivo* they would likely cause  
209 urothelial cells to release more ATP in the sub-urethral space, potentially leading  
210 to mitochondrial dysfunction and cell apoptosis.

211 Commensal bacteria are more abundant than pathogens in the bladder of healthy  
212 women and are associated with a reduced risk of UII by inhibiting the  
213 pathogenesis process [9]. We surmised that they might have a protective role  
214 against extracellularly deposited bacterial ATP. This was supported by  
215 experiments showing that *L. crispatus* and *L. gasseri* did not release significant  
216 amounts of ATP [Fig 3B], and *L. crispatus* could reduce ATP levels in AU  
217 supplemented with ATP 0.1 mM [Fig 3C]. In addition, *L. crispatus* and *L. gasseri*  
218 inhibited the stimulation of calcium influx caused by *E. coli*-derived compounds  
219 [Fig 2A/B and C]. Preliminary evidence was obtained that commensal bacteria

220 could degrade or utilize ATP, with *L. crispatus* reducing its levels in AU.  
221 *Lactobacillus crispatus* also increased *MAOB* gene expression [Fig 5B], encoding  
222 enzymes that can degrade biogenic amines neuroactive chemicals. A decrease in  
223 the level of these mitochondrial enzymes has been postulated to worsen  
224 neurological disorders and may also be another mechanism by which commensal  
225 bacteria mitigate the effects of these chemicals [17].

226 Lactobacilli are typically restricted to glycolytic and fermentative pathways  
227 which produce much less ATP than through the respiratory pathways used by other  
228 bacteria. If lactobacilli present in the bladder microbiota or even the vagina, can  
229 scavenge ATP it may not only potentially provide an extra energy source for the  
230 bacteria, but could sequester it away from the epithelial layer thereby promoting a  
231 homeostatic environment. These are important findings, since ATP promoted  
232 collagen matrix contraction by myofibroblasts [Fig 7A/D], an *in vitro* model of  
233 smooth muscle contraction, suggesting a mechanism for premature voiding and the  
234 potential for lactobacilli strains to interfere with this process. However, not all  
235 strains of lactobacilli tested were protective against the effects of ATP.

236 *Lactobacillus vaginalis*, commonly found in the oral, vaginal, and intestinal  
237 microbiomes, has been associated with intermediate grades of bacterial vaginosis  
238 [18]. In this study, *L. vaginalis* was found to release  $0.314 \pm 0.023$  uM ATP [Fig  
239 3B], several fold more than *E. coli*, which suggests that certain lactobacilli may in  
240 fact be part of the disease process, though will require more investigation.

241           The neurotransmitter GABA is produced by bacteria [19] including certain  
242 species of *Lactobacillus*, and we showed that while it did not cause contraction of  
243 myofibroblasts [Fig 7], it could inhibit contraction caused by *E. coli* [Fig 7E]. The  
244 increase in intracellular calcium levels results in the secretion of ATP by urothelial  
245 cells [Fig 3K], with two potential mechanisms likely. ATP can be released via  
246 channels, such as the connexin hemichannels, pannexin as well as several anion  
247 channels [20]. It is possible that stimulation of calcium influx in urothelial cells  
248 may cause increased expression of vesicular nucleotide transporter (VNUT) in the  
249 cell and subsequent release of ATP into the sub-urethral and muscle layer causing  
250 bladder contraction. The alternative is for a continuously activated calcium channel  
251 leading to mitochondrial calcium overload, apoptosis and release of ATP from  
252 urothelial cells [21].

253           Alpha smooth muscle actin ( $\alpha$ -SMA) has a well substantiated, central role in  
254 the production of contractile force during wound healing and fibro-constrictive  
255 diseases [22]. Confocal and qPCR results herein show a direct correlation between  
256 increased  $\alpha$ -SMA immunoreactivity and uropathogen induced contraction of the  
257 collagen gel matrix by myofibroblasts *in vitro* [Fig 8B/C and 7B]. There was also a  
258 correlation between decreased  $\alpha$ -SMA immunoreactivity and a decrease in  
259 collagen matrix contraction induced by *L. crispatus* [Fig 8B/C and 7B]. Increased  
260 intracellular calcium levels can drive the urothelial cells to the apoptosis phase.  
261 TNF-alpha can be an inducer of apoptosis [23], and so the ability of *L. crispatus* to

262 reduce the *E. coli*-stimulated upregulation of this gene in myofibroblast cells, could  
263 be significant [Fig 8D].

264 In summary, we report the discovery of a potential means by which  
265 commensal members of the urinary microbiota, in particular *L. crispatus* and *L.*  
266 *gasseri*, can mitigate the ability of uropathogenic *E. coli* to stimulate pathways  
267 associated with conditions such as UUI.

268

269

270

271

272

## 273 **MATERIALS and METHODS**

### 274 **Bacterial supernatant preparation**

275 *Escherichia coli* 1A2 UPEC was maintained on LB agar (Difco, MD),  
276 *Lactobacillus gasseri* KE-1 (urinary isolate), *Lactobacillus crispatus* ATCC  
277 33820, *Enterococcus faecalis* ATCC 33186, were maintained on MRS agar (Difco,  
278 MD), *Gardnerella vaginalis* ATCC 14018, *Lactobacillus vaginalis* NCFB 2810  
279 were maintained on CBA and *Gardnerella* Selective Agar. For these studies, all  
280 strains of bacteria were grown in artificial urine [24] which in preliminary  
281 experiments was shown not to stimulate the influx of calcium when in the presence  
282 of human cell lines.

283 Supernatants were collected from cultures grown overnight (24 hours) at  
284 37°C after reaching stationary phase. Cultures were pelleted by centrifugation at  
285 5000 rpm (Eppendorf Centrifuge 5804 R) for 15 minutes. The supernatant was pH  
286 adjusted to 7.0 with 0.1 Molar HCL or NaOH, filter sterilized with 0.22 um sterile  
287 syringe filter, and aliquoted and stored at -20 C° until use. In the case of *E. coli* and  
288 *E. faecalis*, overnight cultures were diluted 1:100 with fresh artificial urine,  
289 returned to incubation at 37 °C and sampled at T= 1, 2, 3, 4, 5 and 24 hours for  
290 testing. For the experiments involving the addition of supernatants from *L.*  
291 *crispatus* or *L. gasseri* to that from uropathogens, the urothelial cells were first  
292 treated with *L. crispatus* or *L. gasseri* supernatant for one minute, then the

293 uropathogenic supernatant was added. In the case of serial dilution, *L. crispatus*  
294 supernatant was diluted for 6-fold to the *E. coli* supernatant.

295 For investigation the subtherapeutic concentration of ciprofloxacin, the *L.*  
296 *crispatus* was grown in deMan, Rogosa, Sharpe media (MRS, Difco, MD). Growth  
297 curves for these bacteria were generated using a plate reader (Eon Biotek, VT) at  
298 OD600 and 37°C to determine exponential phase.

299

### 300 **Cell culture**

301 Bladder epithelial cells (5637 –ATCC HTB-9) were maintained in RPMI  
302 1640 (Roswell-Park Memorial Institute media – Thermo Fisher Scientific, MA)  
303 supplemented with 10% fetal bovine serum (FBS) (Thermo Fisher Scientific, Ma.)  
304 and 2 mM L-glutamine (Thermo Fisher Scientific, MA.) at 37°C and 5% CO<sub>2</sub>. The  
305 media was changed every 48 hours or more regularly if the cells were confluent  
306 (90%-100%), after washing by 1X PBS and trypsinization by 0.25% Trypsin-  
307 EDTA (1X) (Gibco), with the ratio of 1 to 10. Primary myofibroblast cells were  
308 extracted from the palmar fascia during surgery from normal tissue. Primary  
309 cultures were maintained in DMEM with 10% fetal bovine serum (FBS; Life  
310 Technologies, Carlsbad, CA, USA), 1% L-glutamine (Life Technologies) and 1%  
311 antibiotic–antimycotic solution (Life Technologies) at 37°C in 5% CO<sub>2</sub>. All  
312 primary cell lines were used up to a maximum of four passages, after which they  
313 were discarded.



314

### 315 **RNA isolation and qPCR from cell lines**

316 RNA was isolated from the samples (200 ng/uL) using the Ambion by Life  
317 Technologies Purelink™ RNA mini kit (Thermo Fisher Scientific, MA), following  
318 the manufacturer's instructions. cDNA was made following the instructions on the  
319 Applied Biosystems High Capacity cDNA Reverse Transcription Kit (Thermo-  
320 Fisher Scientific, MA) and PCR was conducted using a Master Cycler gradient  
321 PCR thermal cycler (Eppendorf, NY). Using GAPDH as the housekeeping gene,  
322 qPCR was set up with each sample being run on the plate in triplicate for each of  
323 the conditions. A list of the primer sequences used can be found in Table 1. Power  
324 SYBR Green PCR Master Mix was used (Thermo Fisher Scientific, MA).

325

### 326 **Fluorescent microscopy of calcium influx of 5637 cells**

327 The influx of calcium was measured using the Fluo-4 Direct™ Calcium  
328 Assay kit (Invitrogen™, CA). Samples and reagents were prepared according to  
329 the protocol manual provided. Ninety-six well plates were seeded with 100 µl of  
330 5637 cells at  $1 \times 10^5$  cells/mL in supplemented RPMI and allowed to reach  
331 confluency, which occurred at about 48-72 hours. Cells were counted by using the  
332 Invitrogen Countess Automated Cell Counter (Thermo Fisher Scientific, MA.) per  
333 the manufacturers' instructions. Fifty microliters of cell culture media were  
334 removed from the initial 100 µl and 50 µl of Fluo-4 Direct™ calcium reagent was

335 added to each well. The plate was incubated at 37° C for 30 minutes at room  
336 temperature while protected from light. Controls included ionomycin (1 uM,  
337 Sigma ≥98% HPLC), ATP (1 uM, Sigma A1852), GABA (1uM, Sigma BioXtra  
338 ≥99%) and LPS (0.13 milligram/mL, Sigma L3755). The effect of treatments was  
339 assessed using a Nikon epifluorescence Ts2R scope at 10x magnification at 494nm  
340 for excitation and 516 nm for emission for 60 seconds. The image intensity was  
341 calculated using ImageJ and is indicative of Ca<sup>2+</sup> influx into the urothelial cell's  
342 cytoplasmic space from either the extracellular environment or intracellular Ca<sup>2+</sup>  
343 stores (here on out just referred to as Ca<sup>2+</sup> influx).

344

### 345 **Quantification of ATP**

346 A luminescent assay kit (BacTiter-Glo™ Microbial Cell Viability Assay,  
347 G8230) was used to quantify the amount of extracellular ATP released by the  
348 bacteria into the supernatant and released by the cells into the cell media. The  
349 Synergy™ H4 Hybrid Multi-Mode Microplate Reader was used to quantify the  
350 amount of extracellular ATP.

351

### 352 **Myofibroblast populated collagen contraction**

353 A collagen matrix was set up using 1.8 mg/ml sterile collagen and a  
354 neutralization solution [25]. The neutralization solution was made by mixing  
355 Waymouth Media (Sigma, W1625) and 2 parts 0.34M NaOH (Sigma, 221465).

356 One-part neutralization mixture was then added to 4 parts collagen, mixed with  
357  $1 \times 10^5$  cells to a final volume of 500  $\mu$ l and added to each well in a 24 well plate.  
358 After 45-minute incubation at 37<sup>0</sup>C, 1 mL 2% FBS was added to each well and the  
359 plate was incubated for an additional 72 hours at 37 <sup>0</sup>C. The media was then  
360 removed, fresh media and treatment was added, and the collagen matrix was  
361 released using a sterile spatula. The plate was scanned using a Canon PIXMA  
362 MP250 immediately after release and also at 1, 3, 5 and 24 hours. The size of the  
363 collagen matrix was measured using ImageJ and the percent contraction was  
364 calculated. To decrease any shock to the myofibroblast, all bacterial strains were  
365 grown in DMEM with 2% FBS.

366

### 367 **Immunocytochemistry**

368 Myofibroblast cells were cultured in a  $\mu$ -Slide 8 Well (ibidi, 80826) to  
369 become fully confluent (90%-100%). Cell were fixed with paraformaldehyde for  
370 10 minutes at room temperature, then permeabilized with 0.1% Triton X-100 in  
371 PBS. Non-specific staining was blocked with Background Sniper (Biocare  
372 Medical, BS966). Cells were stained by incubating with the monoclonal anti-actin,  
373  $\alpha$ -smooth muscle (Sigma, A2547) diluted 1:200 and using Alexa Fluor 488  
374 Donkey anti-mouse IgG secondary antibody (ThermoFisher, A-21202) to detect  
375 the fluorescence. The cells were washed, excess liquid aspirated, and secondary  
376 antibody solution was added (1-10ug/ml) (Alexa Fluor 488 Donkey anti-mouse

377 IgG secondary antibody, ThermoFisher, A-21202). DAPI staining was used for  
378 nuclei. Confocal images were obtained with a Nikon Eclipse Ti2 (X60 objective  
379 lens, Nikon, Canada). Fluorescence intensity measurements were obtained from  
380 entire cells and analyzed with Image J software. Control specimens were identical  
381 to experimental specimens except they were exposed to irrelevant isotype matched  
382 antibody.

383

### 384 **Myofibroblast populated collagen RNA extraction and qPCR**

385 After incubation and aspiration of media, the collagen matrix was collected  
386 in microcentrifuge tubes for high speed centrifugation for 5 minutes and then the  
387 supernatant was discarded. An aliquot of 100 uL pre-warmed 0.25 mg/ml  
388 collagenase was added to each tube and incubated for 15 minutes at 37°C. RNA  
389 was isolated from the samples using the Direct-zol RNA Miniprep Kit (Zymo  
390 Research) following the manufacturer's instructions, and Trizol reagent was used  
391 to lyse the samples. The RNA concentration was measured using nanodrop. cDNA  
392 was made following the instructions on the Applied Biosystems High Capacity  
393 cDNA Reverse Transcription Kit (Thermo-Fisher Scientific, MA) and PCR was  
394 conducted using a MasterCycler gradient PCR thermal cycler (Eppendorf, NY).  
395 Quantitative PCR was set up with each sample being run on the plate in triplicate  
396 for each of the conditions, as described earlier. GAPDH was also used as the

397 housekeeping gene, A list of the primers used can be found in Supplementary

398 Table 1.

399

#### 400 **Statistics**

401 The data are expressed as mean  $\pm$  SEM. Statistical significance was assessed

402 using one-way ANOVA followed by Tukey's test (GraphPad Prism 5)

403

#### 404 **Acknowledgments**

405 This project was funded by Kimberly Clark Corporation who were involved in the

406 study design, analysis and preparation of the manuscript.

407

408

409

410

411

412

413

414

415

416

417

## 418 **References**

- 419 1. Zimmern, P., Litman, H., Nager, C., Lemack, G., Richter, H., Sirls, L., Kraus,  
420 S., Sutkin, G. and Mueller, E. 2014. Effect of aging on storage and voiding  
421 function in women with stress predominant urinary incontinence. *J. Urol.* 192(2):  
422 464-468. <https://doi.org/10.1016/j.juro.2014.01.092>.
- 423 2. von Gontard, A. 2012. Does psychological stress affect LUT function in  
424 children?: ICI-RS 2011. *Neurourol Urodyn.* 31(3): 344-348.  
425 <https://doi.org/10.1002/nau.22216>
- 426 3. Foxman, B. 2002. Epidemiology of urinary tract infections: Incidence,  
427 morbidity, and economic costs. *Amer. J. Med.* 113 Suppl 1A:5S-13S.  
428 [https://doi.org/10.1016/S0002-9343\(02\)01054-9](https://doi.org/10.1016/S0002-9343(02)01054-9).
- 429 4. McCorry, L. 2007. Physiology of the autonomic nervous system. *Amer. J.*  
430 *Pharmceut. Educ.* 71(4): 78.
- 431 5. Whiteside, S., Razvi, H., Dave, S., Reid, G. and Burton, J. 2015. The  
432 microbiome of the urinary tract—a role beyond infection. *Nat. Rev. Urol.* 12(2):  
433 81-90. <https://doi.org/10.1038/nrurol.2014.361>.
- 434 6. Stewart WF, Van Rooyen JB, Cundiff GW, Abrams P, Herzog AR, Corey R,  
435 Hunt TL, Wein AJ. 2003. Prevalence and burden of overactive bladder in the  
436 United States. *World J. Urol.* 20(6):327-36. [https://doi.org/10.1007/s00345-002-](https://doi.org/10.1007/s00345-002-0301-4)  
437 [0301-4](https://doi.org/10.1007/s00345-002-0301-4).

- 438 7. Norton, P. and Brubaker, L. 2006. Urinary incontinence in women. *The Lancet*  
439 367(9504): 57-67. [https://doi.org/10.1016/S0140-6736\(06\)67925-7](https://doi.org/10.1016/S0140-6736(06)67925-7).
- 440 8. Siddiqui, H., Nederbragt, A., Lagesen, K., Jeansson, S. and Jakobsen, K. 2011.  
441 Assessing diversity of the female urine microbiota by high throughput sequencing  
442 of 16S rDNA amplicons. *BMC. Microbiol.* 11(1): 244.  
443 <https://doi.org/10.1186/1471-2180-11-244>.
- 444 9. Pearce MM, Hilt EE, Rosenfeld AB, et al. 2014. The female urinary  
445 microbiome: a comparison of women with and without urgency urinary  
446 incontinence. *mBio.* 5(4):e01283-14. doi:10.1128/mBio.01283-14.
- 447 10. de Groat WC1, Yoshimura N2. 2015. Anatomy and physiology of the lower  
448 urinary tract. *Handbook Clin. Neurol.* 130:61-108. [https://doi.org/10.1016/B978-0-](https://doi.org/10.1016/B978-0-444-63247-0.00005-5)  
449 [444-63247-0.00005-5](https://doi.org/10.1016/B978-0-444-63247-0.00005-5).
- 450 11. Fowler, C., Griffiths, D. and de Groat, W. 2008. The neural control of  
451 micturition. *Nat. Rev. Neurosci.* 9(6): 453-466. <https://doi.org/10.1038/nrn2401>.
- 452 12. Mempin, R., Tran, H., Chen, C., Gong, H., Kim Ho, K. and Lu, S. 2013.  
453 Release of extracellular ATP by bacteria during growth. *BMC Microbiol.* 13(1):  
454 301. <https://doi.org/10.1186/1471-2180-13-301>.

- 455 13. Song J, Duncan MJ, Li G, Chan C, Grady R, Stapleton A, Abraham SN. 2007.  
456 A novel TLR4-mediated signaling pathway leading to IL-6 responses in human  
457 bladder epithelial cells. PLoS Pathog. 3(4): e 60. DOI:  
458 10.1371/journal.ppat.0030060
- 459 14. Birder, L. and de Groat, W. 2007. Mechanisms of disease: involvement of the  
460 urothelium in bladder dysfunction. Nat. Clin. Pract. Urol.4(1): 46-54.  
461 <https://doi.org/10.1038/ncpuro0672>.
- 462 15. Höbaus J, Thiem U, Hummel DM, Kallay E. 2013. Role of calcium, vitamin D,  
463 and the extrarenal vitamin D hydroxylases in carcinogenesis. Anti-Cancer Agents  
464 Medic. Chem. 13(1): 20-35. <https://doi.org/10.2174/1871520611307010020>.
- 465 16. Irvani A, Tice AD, McCarty J, Sikes DH, Nolen T, Gallis HA, Whalen  
466 EP, Tosiello RL, Heyd A, Kowalsky SF. 1995. Short-course ciprofloxacin  
467 treatment of acute uncomplicated urinary tract infection in women. The minimum  
468 effective dose. The Urinary Tract Infection Study Group [corrected]. Arch Intern  
469 Med. 13;155(5):485-94.
- 470 17. Manor I, Tyano S, Mel E, Eisenberg J, Bachner-Melman R, Kotler M, Ebstein  
471 RP. 2002. Family-based and association studies of monoamine oxidase A and  
472 attention deficit hyperactivity disorder (ADHD): preferential transmission of the  
473 long promoter-region repeat and its association with impaired performance on a



- 474 continuous performance test (TOVA). *Mol. Psych.* 7 (6): 626-632.  
475 <http://doi.org/10.1038/sj.mp.4001037>.
- 476 18. Embley, T. M., Faquir, N., Bbssart, W., Collins, M.D. 1989. *Lactobacillus*  
477 *vaginalis* sp. nov. from the human vagina. *Int. J. System. Bacteriol.* p. 368-370.  
478 doi: [10.1099/00207713-39-3-368](https://doi.org/10.1099/00207713-39-3-368)
- 479 19. Lyte, M. Probiotics function mechanistically as delivery vehicles for  
480 neuroactive compounds: Microbial endocrinology in the design and use of  
481 probiotics. *Bioessays* **2011**, 33, 574–581  
482 <https://onlinelibrary.wiley.com/doi/abs/10.1002/bies.201100024>
- 483 20. Nakagomi, H, Yoshiyama, M, Mochizuki, T, Miyamoto, T, Komatsu, R,  
484 Imura, Y, Morizawa, Y, Hiasa, M, Miyaji, T, Kira, S, Araki, I, Fujishita, K,  
485 Shibata, K, Shigetomi, E, Shinozaki, Y, Ichikawa, R, Uneyama, H, Iwatsuki, K,  
486 Nomura, M, De Groat, WC, Moriyama, Y, Takeda, M & Koizumi, S. 2016.  
487 'Urothelial ATP exocytosis: Regulation of bladder compliance in the urine storage  
488 phase'. *Scientific Reports* vol. 6, 29761.
- 489 21. Lemasters JJ, Theruvath TP, Zhong Z, Nieminen AL. 2009. Mitochondrial  
490 calcium and the permeability transition in cell death. *Biochim. Biophys. Acta*  
491 1787(11):1395-401. <https://doi.org/10.1016/j.bbabbio.2009.06.009>.

- 492 22. Deckmann K, Kummer W. 2016. Chemosensory epithelial cells in the urethra:  
493 sentinels of the urinary tract. *Histochem. Cell Biol.* 146: 673.  
494 <http://doi.org/10.1007/s00418-016-1504-x>.
- 495 23. Rath PC, Aggarwal BB. 1999. TNF-induced signaling in apoptosis. *J. Clin.*  
496 *Immunol.* 19(6):350-64.
- 497 24. McLean, R., J. Nickel, K. Cheng, J. Costerton, and J. Banwell. 1988. The  
498 ecology and pathogenicity of urease-producing bacteria in the urinary tract. *Crit.*  
499 *Rev. Microbiol.* 16: 37-79. <http://doi.org/10.3109/10408418809104467>.
- 500 25. Crawford J, Nygard K, Gan BS, O'Gorman DB. 2015. Periostin induces  
501 fibroblast proliferation and myofibroblast persistence in hypertrophic scarring. *Exp*  
502 *Dermatol* 24(2):120-6. <https://doi.org/10.1111/exd.12601>

503 **Supplementary Table 1**

504

| <b>Primer</b>                                                       | <b>Primer Pair ID</b> | <b>Gene Name</b>                         | <b>Gene Symbol</b> | <b>Gene ID</b> | <b>Exons</b> |
|---------------------------------------------------------------------|-----------------------|------------------------------------------|--------------------|----------------|--------------|
| <b><i>GAPDH</i></b><br>Sigma 1235                                   | H_GAPDH_1             | Glyceraldehyde-3-phosphate dehydrogenase | GAPDH              | 2597           | 9-10         |
| <b><i>MAOA</i></b><br>Sigma 1257                                    | H_MAOA_1              | Monoamine oxidase A                      | MAOA               | 4128           | 3-5          |
| <b><i>MAOB</i></b><br>Sigma 1257                                    | H_MAOB_1              | Monoamine oxidase B                      | MAOB               | 4129           | 12-13        |
| <b><i>TNF-alpha</i></b><br>ThermoFisher Scientific<br>Hs00174128_m1 | H-TNF-alpha           | Tumor necrosis factor                    | TNF- $\alpha$      | 7124           | 3-4          |
| <b><i>ACTA2</i></b><br>ThermoFisher Scientific<br>Hs00426835_g1     | H-ACTA2               | Actin, alpha 2, smooth muscle, aorta     | ACTA2              | 11475          | 2-3          |

505

506

507

508

509 **Figure Legends**

510

511 **Fig 1: Effect of *E. coli* and *E. faecalis* on the stimulation of Ca<sup>2+</sup> influx in 5637**

512 **uroepithelial cells.** Bacterial supernatant (S<sup>N</sup>) was added to the 5637 cells (A), S<sup>N</sup>

513 from either *E. coli* (B) or *E. faecalis* (C) were taken from hourly growth at 1, 2, 3,

514 4, 5, 24 hours and artificial urine (AU) and tested for their ability to induce Ca<sup>2+</sup>

515 influx in the 5637 cells. Each bar represents the total average image intensity 60

516 seconds after treatment of a duplicate sample. Statistical significance was

517 determined using Tukey's test,  $p \leq 0.05$ .

518

519 **Fig 2: Effect of *L. crispatus* and *L. gasseri* on Ca<sup>2+</sup> influx caused by UPEC**

520 **supernatant.** Treatments were added as either *E. coli* S<sup>N</sup> and AU or *L. crispatus* S<sup>N</sup>

521 and AU, or *E. coli* S<sup>N</sup> + *L. crispatus* S<sup>N</sup> (A), or *E. coli* S<sup>N</sup> and AU or *L. gasseri* S<sup>N</sup>

522 and AU, or *E. coli* S<sup>N</sup> + *L. gasseri* S<sup>N</sup> (B), or a six-fold serial dilutions of the *L.*

523 *crispatus* S<sup>N</sup> in the *E. coli* S<sup>N</sup> (C), image examples of calcium influx caused by *E.*

524 *coli*, *L. crispatus* and a mixture of S<sup>N</sup> from the two bacteria (D). Each point

525 represents the average image intensity of a timepoint. Statistical significance was

526 determined using Tukey's test,  $p \leq 0.05$ .

527

528 **Fig 3: Release of extracellular ATP by bacteria.** *E. coli*, *L. crispatus*, *L. gasseri*,

529 *G. vaginalis* and *L. vaginalis* S<sup>N</sup> were collected from overnight cultures grown in

530 AU and measured for ATP (**A and B**). Statistical significance was determined  
531 using Tukey's test,  $p \leq 0.05$ . *L. crispatus* was grown in AU supplemented with 0.1  
532 millimolar of ATP overnight, the amount of ATP was evaluated by luminometer  
533 (**C**). Growth of *L. crispatus* and *E. coli* was measured in the presence of different  
534 concentrations of ATP in AU (**D and E**), additionally for *L. crispatus*  
535 supplemented with *E. coli* or *G. vaginalis* supernatants (**F and G**). The ability of *L.*  
536 *crispatus* to reduce the amount of ATP in AU supplemented with 25% of *E. coli* S<sup>N</sup>  
537 (**H**), and 25% *G. vaginalis* S<sup>N</sup> individually, was also examined (**I**). The ability of  
538 25% of *G. vaginalis* to induce *L. crispatus* to reduce pH was also examined (**J**).  
539 RPMI was supplemented with small quantities of ATP and incubated for two  
540 minutes. ATP was measured before and after the addition of the ATP (**K**).

541

542 **Fig 4: Release of ATP by *E. coli* in the presence of ciprofloxacin.** This was to  
543 determine the minimum inhibitory and subtherapeutic concentrations of exposure  
544 to this antibiotic. *E. coli* were grown overnight culture in various sub-MIC  
545 concentrations of ciprofloxacin and releases significant quantities of ATP at  
546 different sub-MIC antibiotic concentrations.

547

548 **Fig 5: Fold change of transcript expression of monoamine oxidases**

549 Supernatants from both pure cultures and mixtures of *E. coli* and *L. crispatus* S<sup>N</sup>  
550 were added to 5637 cell cultures for 3 hours. Expression of genes encoding

551 monamine oxidases (*MAOA/MAOB*) were measured by quantitative PCR relative  
552 to GAPDH (**A and B**).

553

554 **Fig 6: Effect of GABA and ATP on Ca<sup>2+</sup> influx in 5637 cells.** To evaluate the  
555 ability of GABA to inhibit the stimulation of calcium influx caused by ATP, AU  
556 containing 1 uM GABA was mixed with 1 uM ATP in AU (**A**) Similarly, to test  
557 the ability of GABA to reduce the stimulation of calcium influx caused by bacterial  
558 supernatant, GABA was mixed with *E. coli* supernatant (**B**). Statistical significance  
559 was determined using Tukey's test,  $p \leq 0.05$ .

560

561 **Fig 7: Contraction of a myofibroblast populated collagen matrix by bacterial**  
562 **supernatants.** Bacterial supernatants from *E. coli*, *L. crispatus* and *L. gasseri* were  
563 added to a myofibroblast populated collagen matrix, both from pure culture and  
564 mixtures with DMEM with 2% FBS. In addition, GABA, ATP and LPS were  
565 included as controls. Contraction over time for these treatments is also shown (**B-**  
566 **F**).

567

568 **Fig 8: Confocal fluorescence microscopy analysis.** Bacterial supernatants from  
569 *E. coli*, *L. crispatus* and in combination were co-cultured with myofibroblasts for 1  
570 hour (**A and B**). The image intensity was measured by confocal microscopy with  
571 DAPI and FITC to show staining of  $\alpha$ -smooth muscle actin. Bacteria supernatants

572 identical to A, were added to the myofibroblasts that were grown in the collagen  
573 matrix and then incubated at 37°C with 5% CO<sub>2</sub> for 3 hours and tested for gene  
574 expression of alpha smooth muscle actin (*ACTA2*) and TNF (**C and D**).

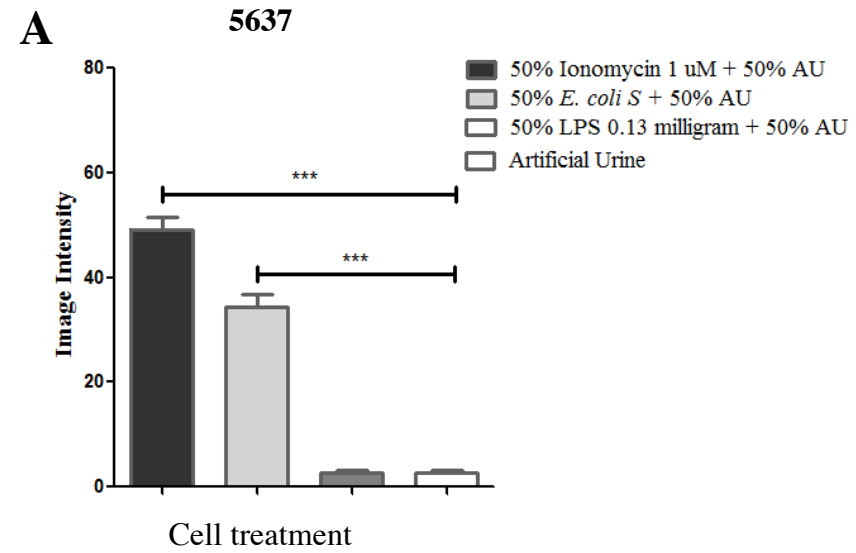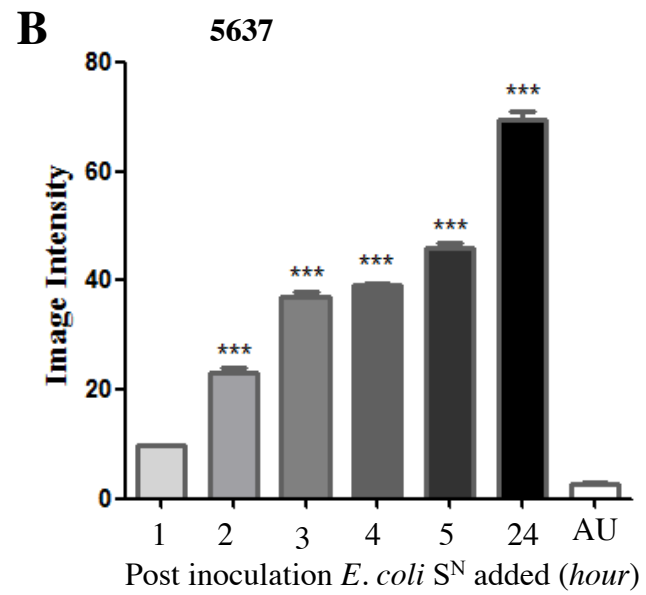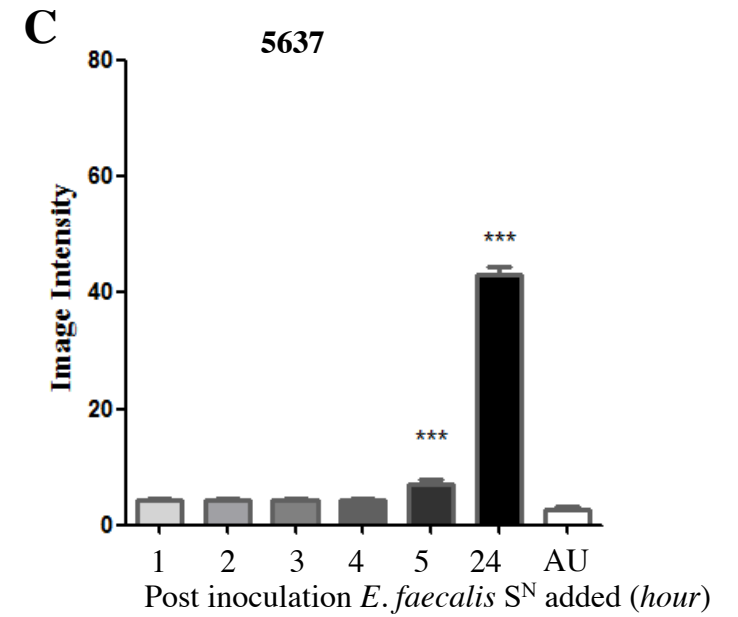

FIG1



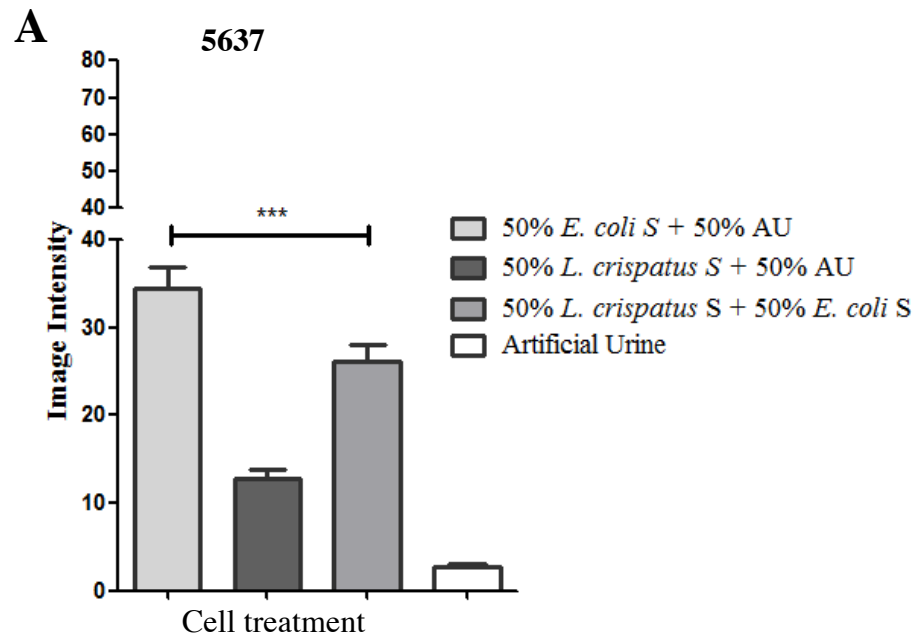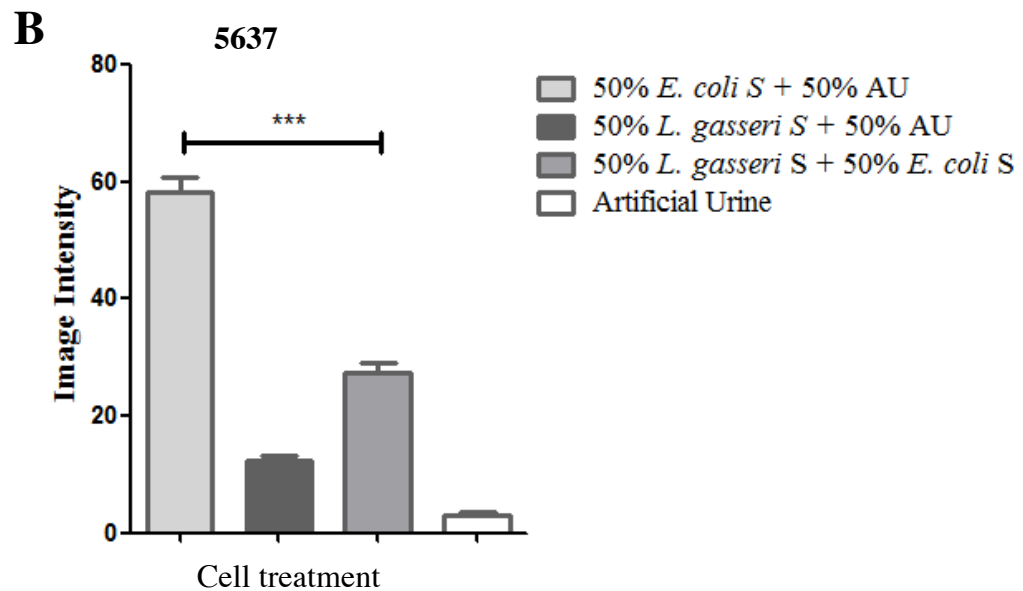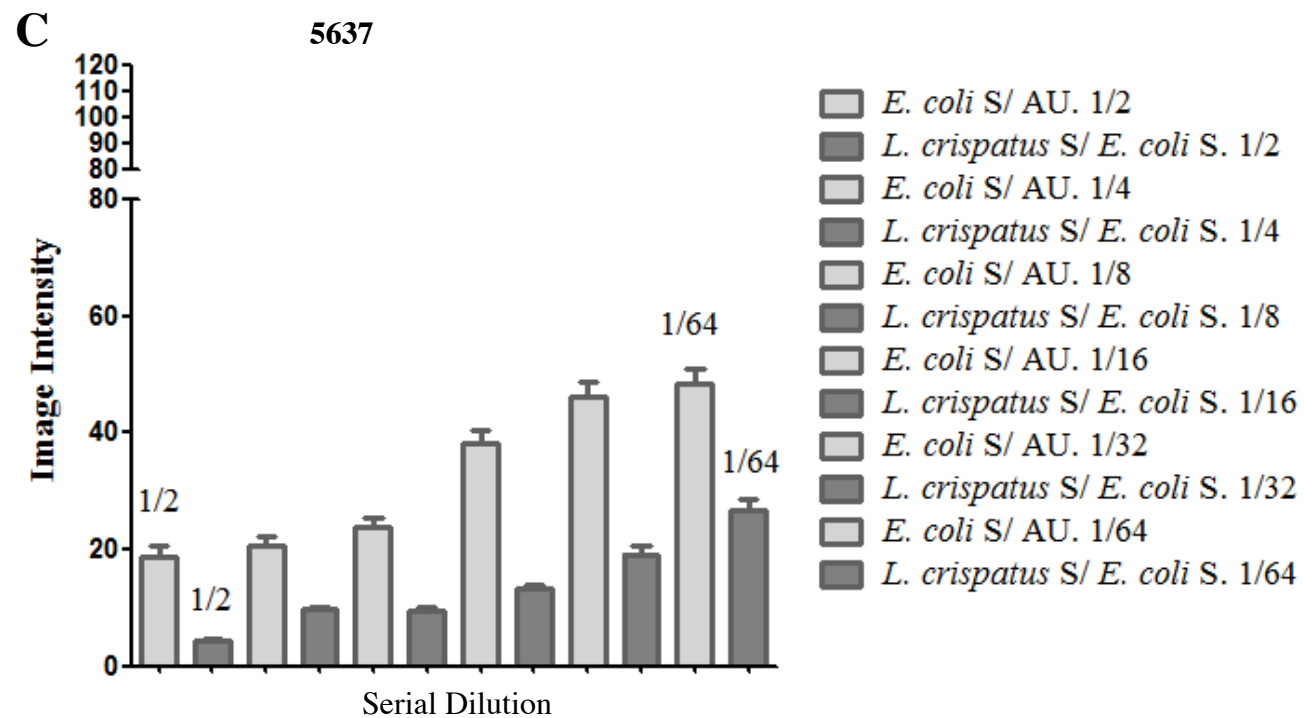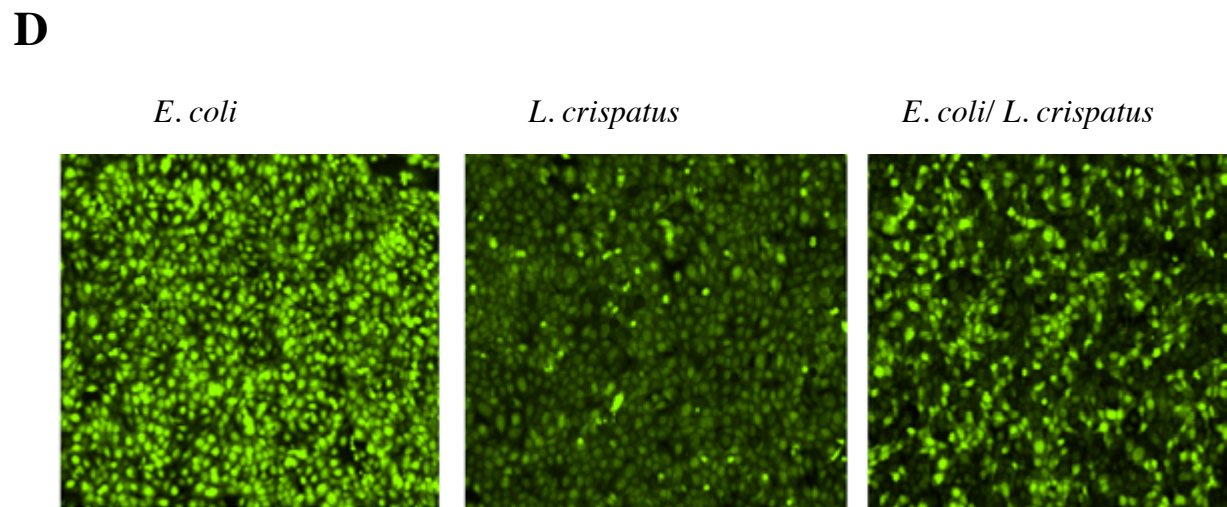

FIG2

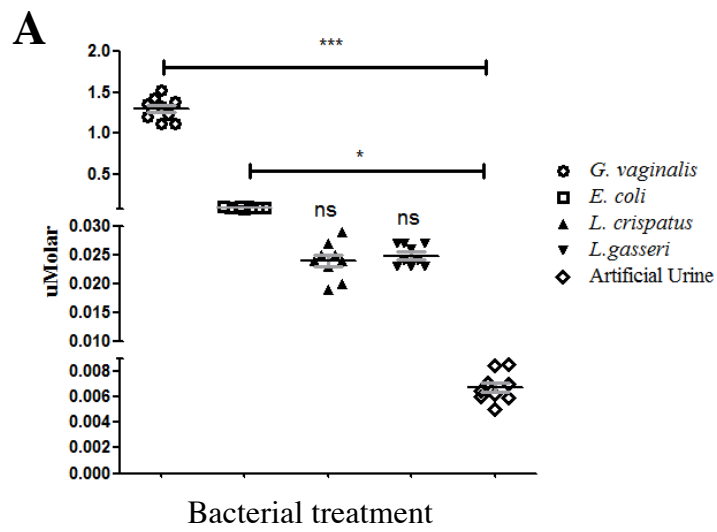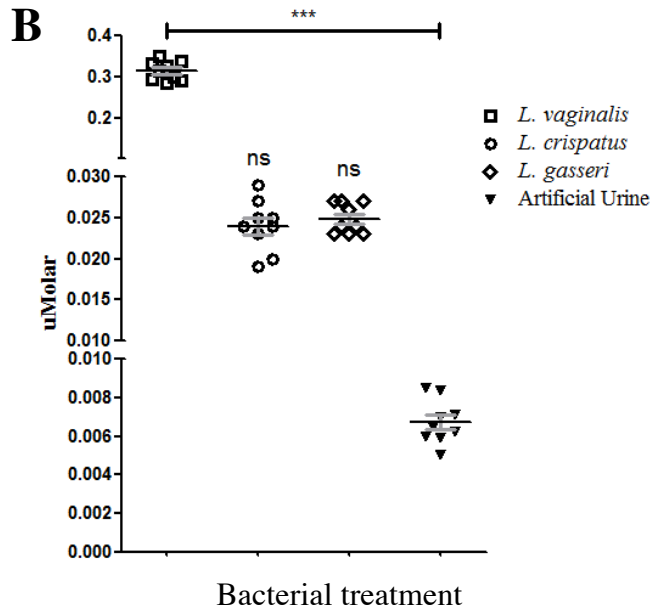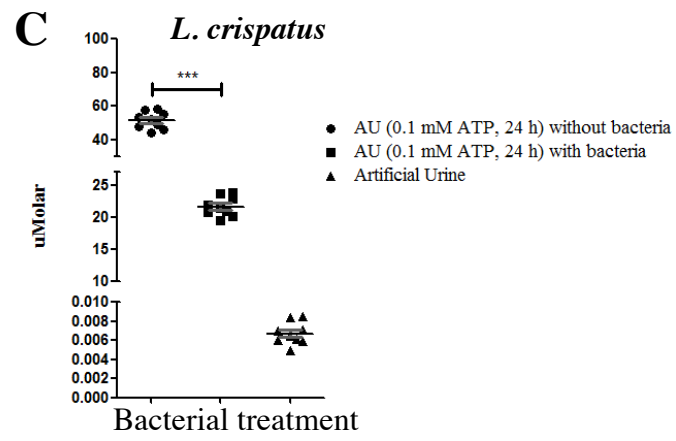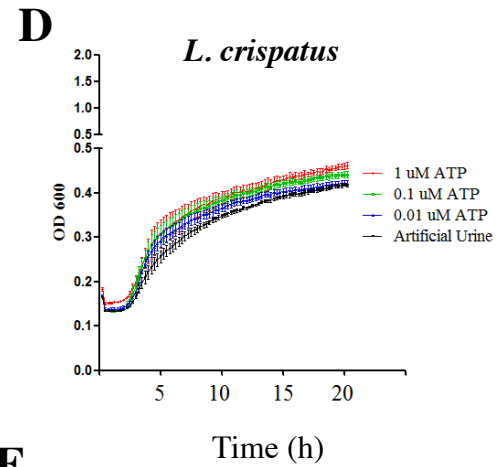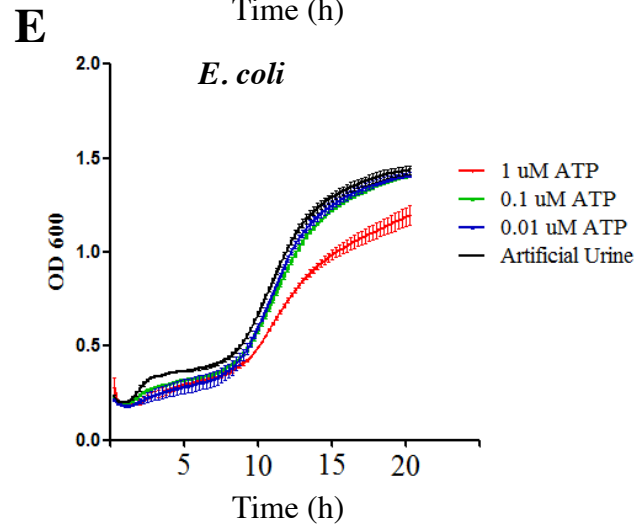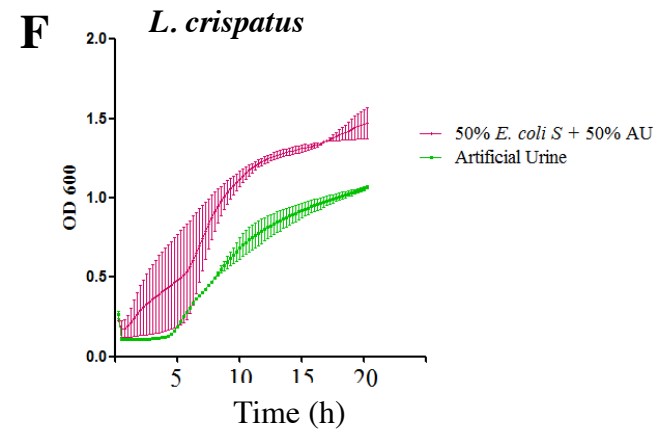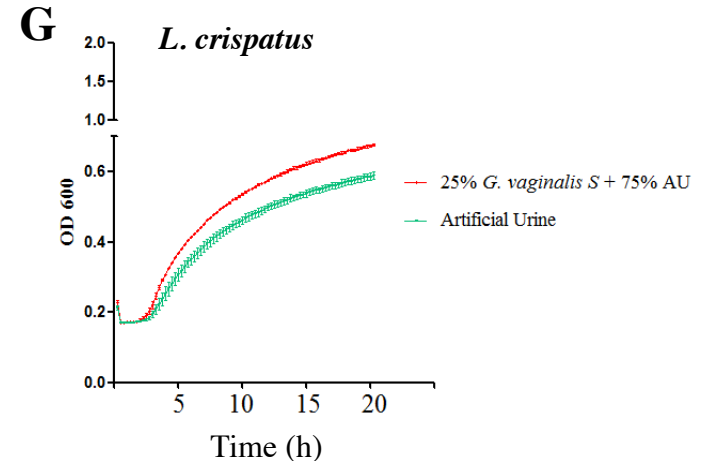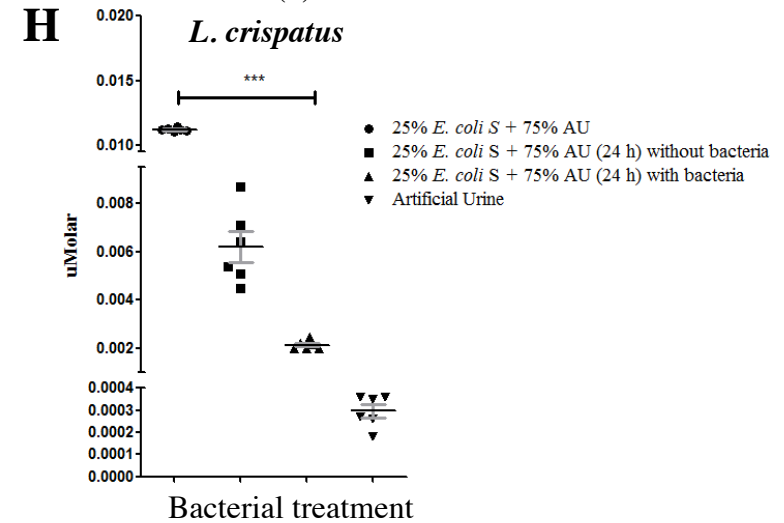

FIG3

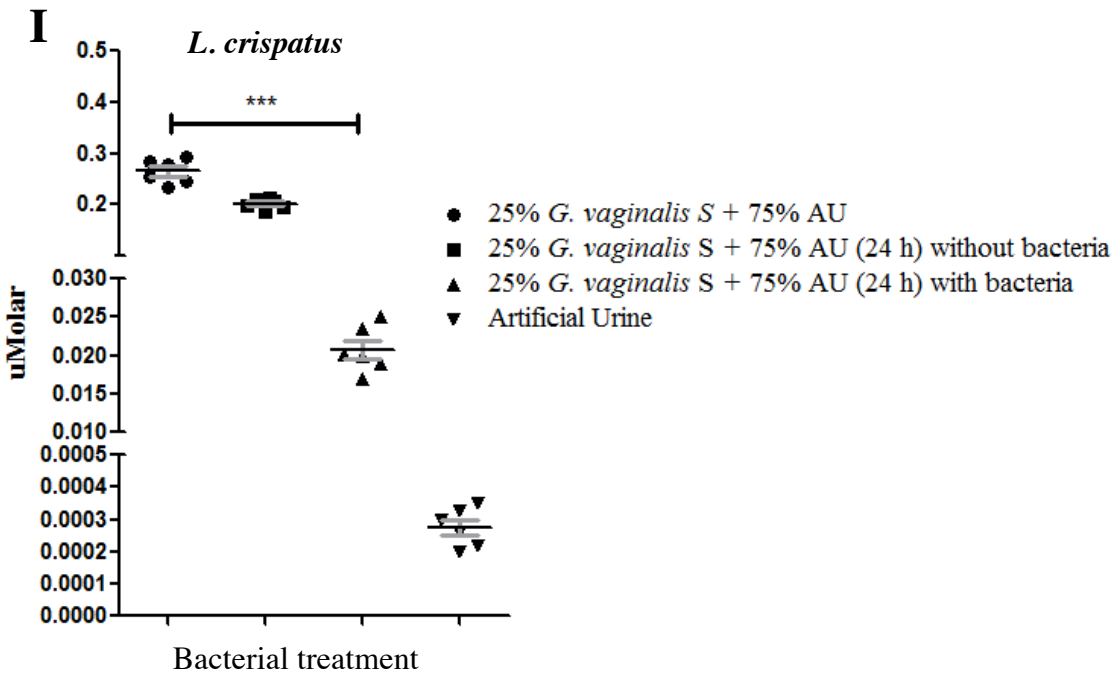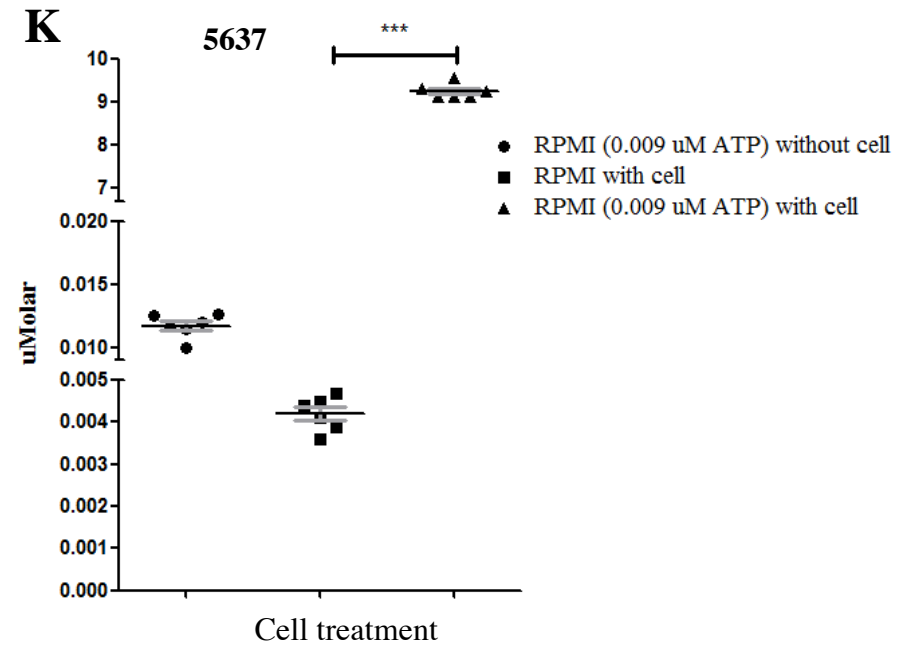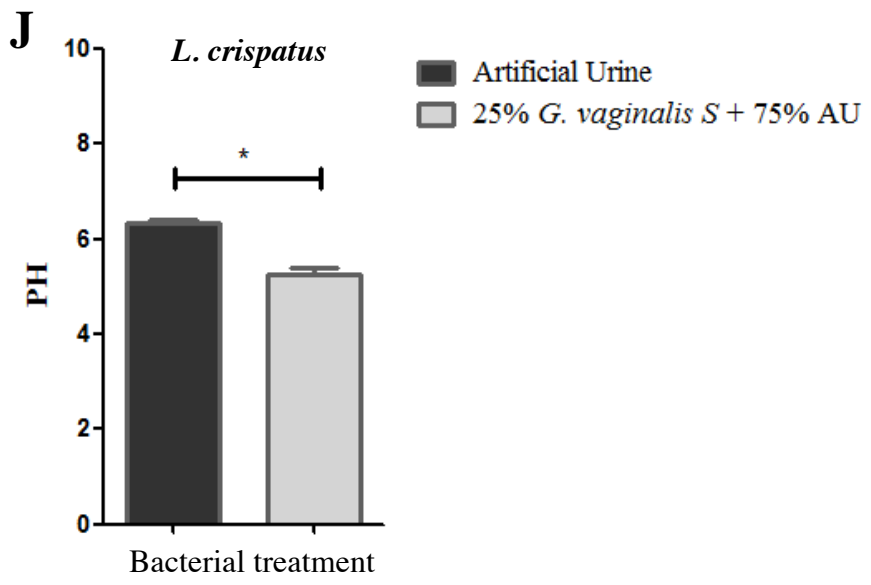

FIG3

*E. coli*

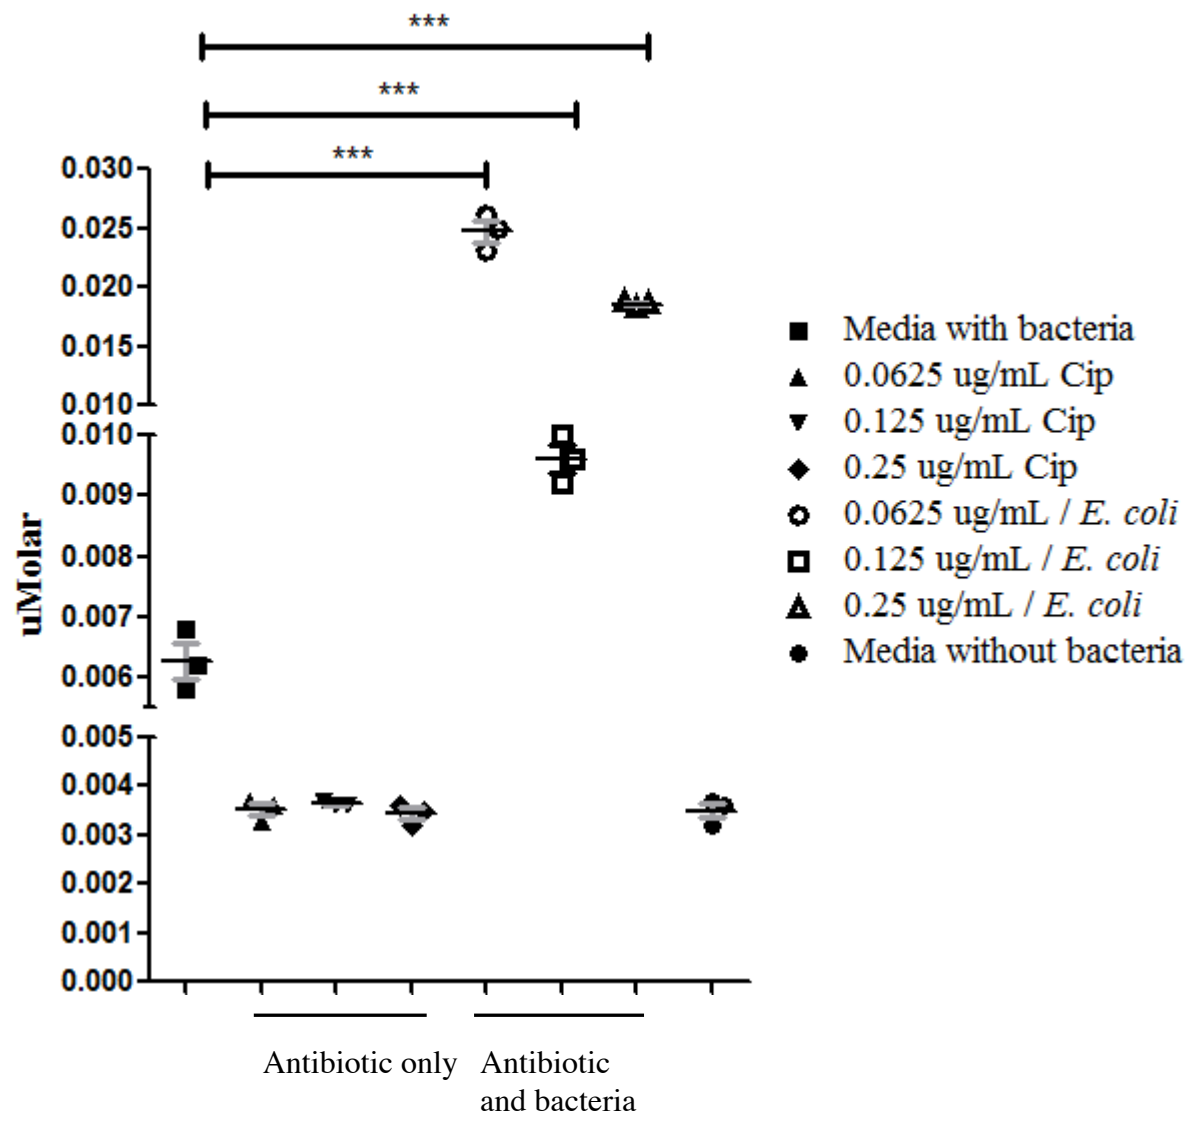

FIG4

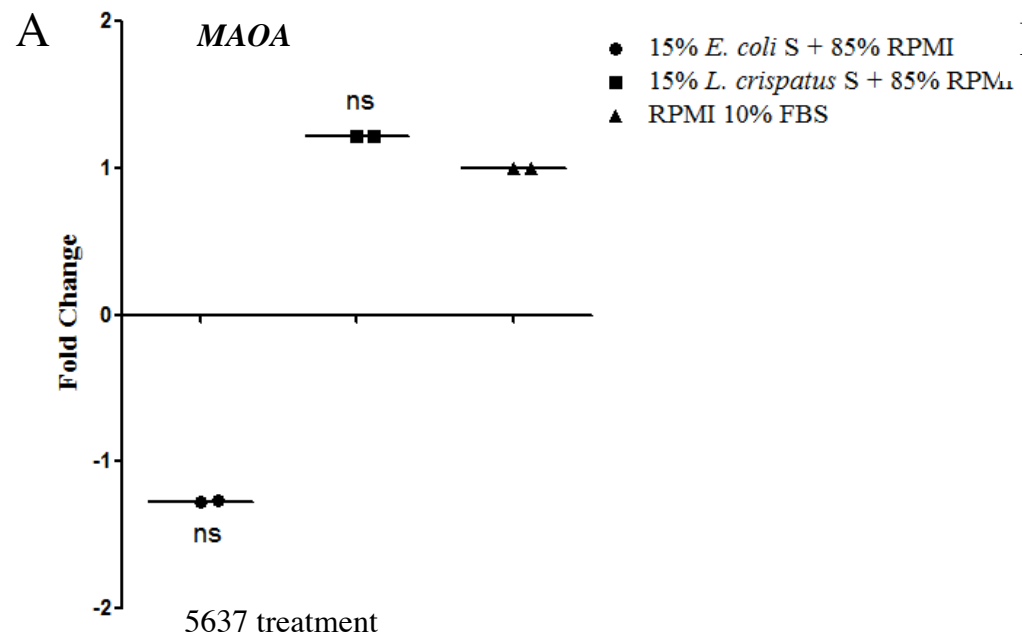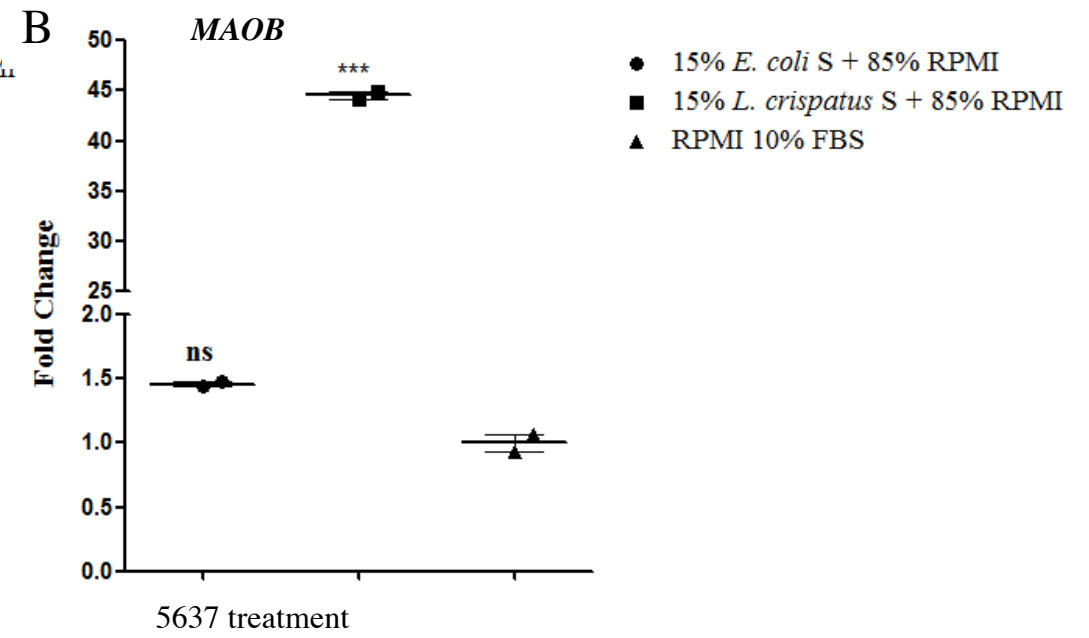

FIG5

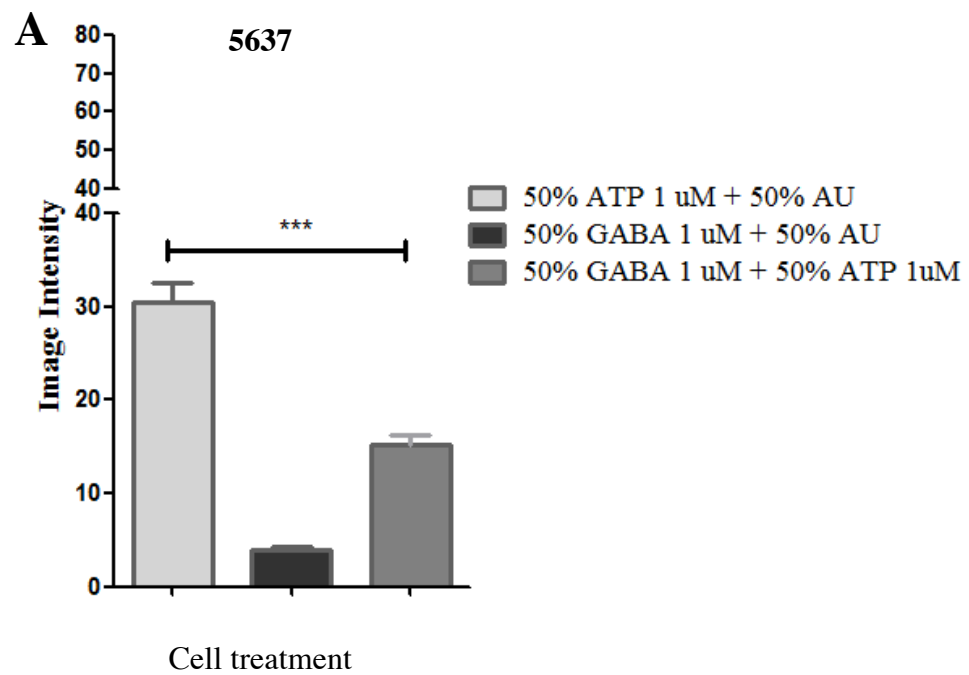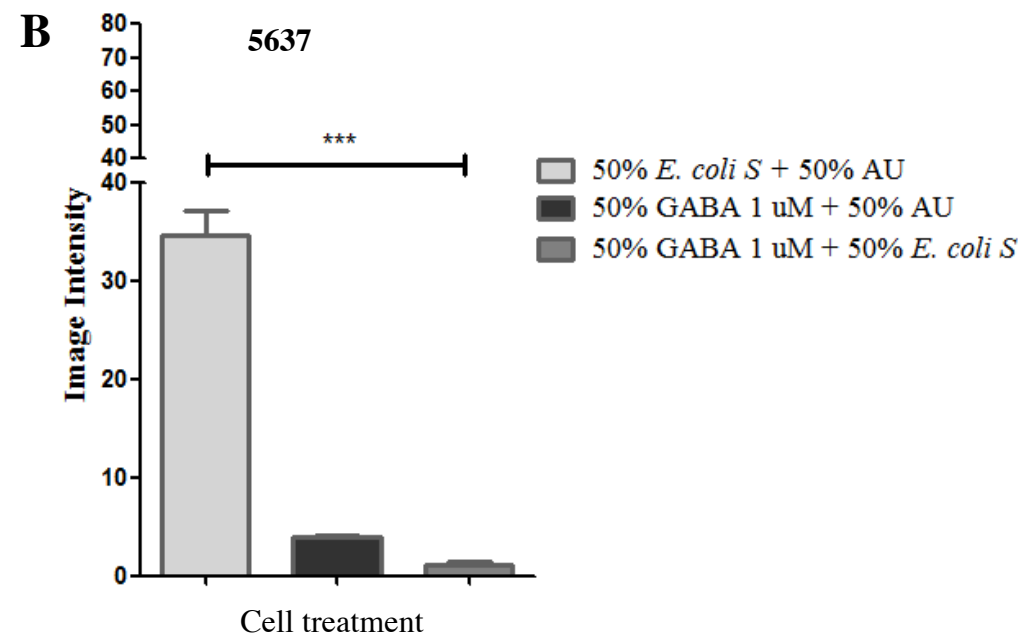

FIG6

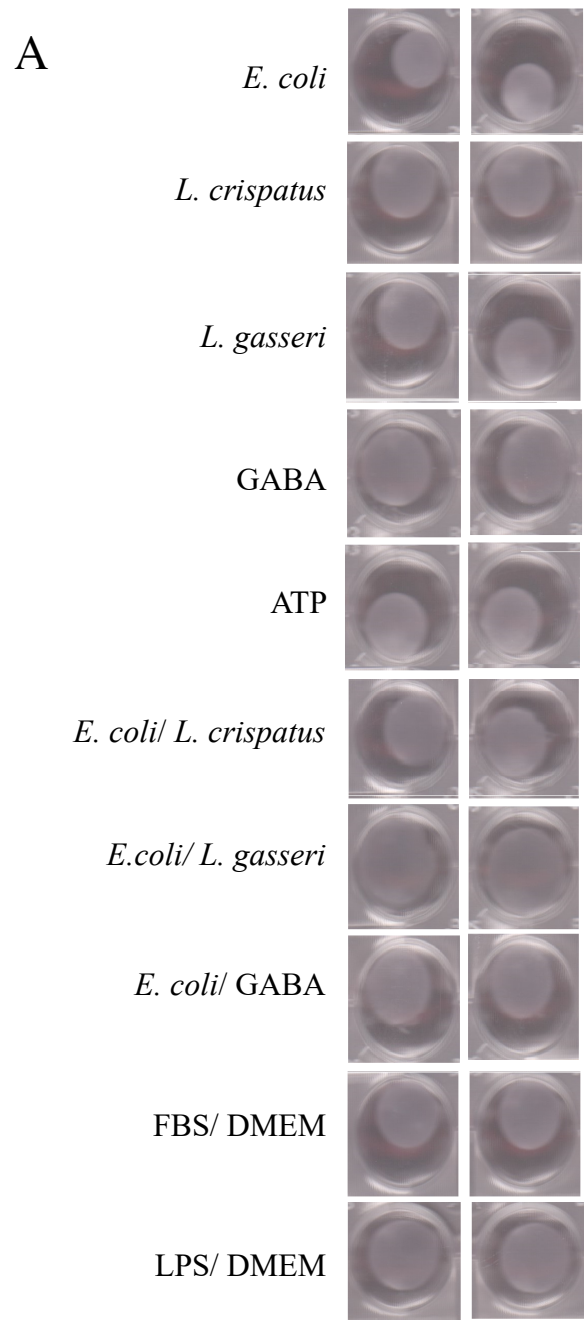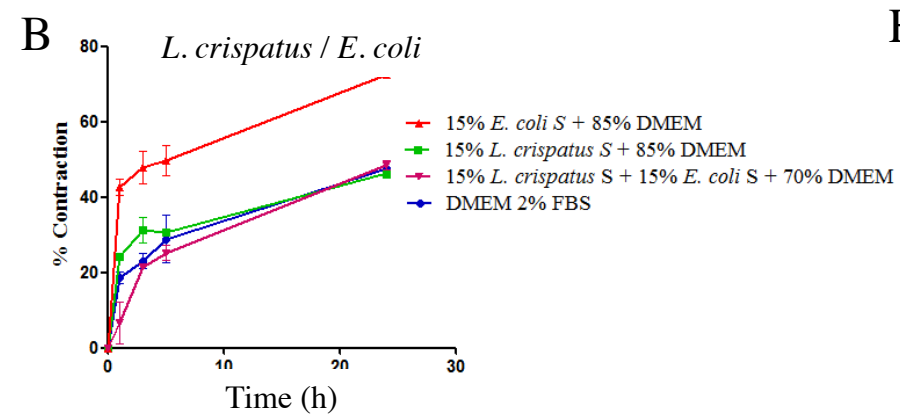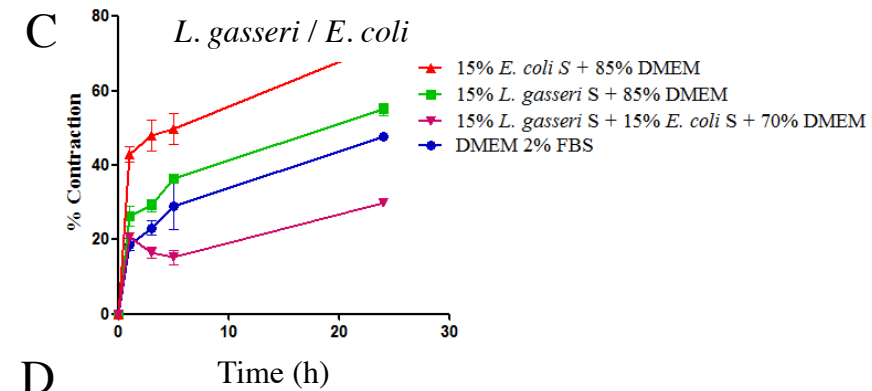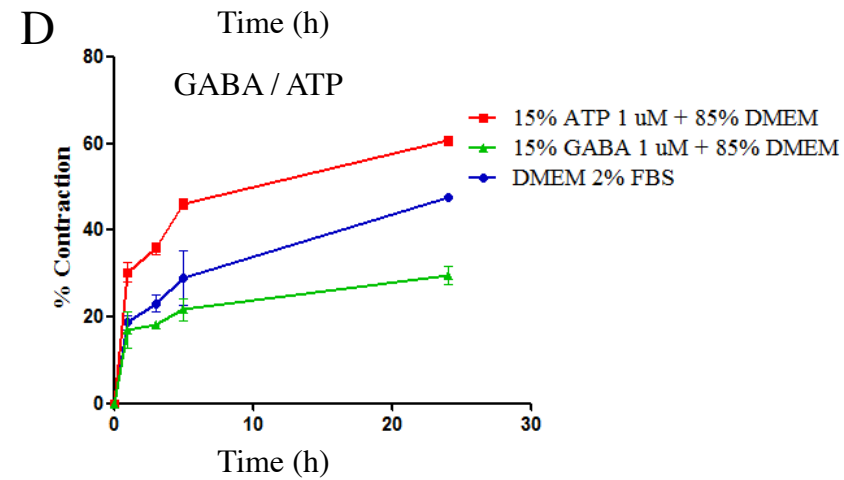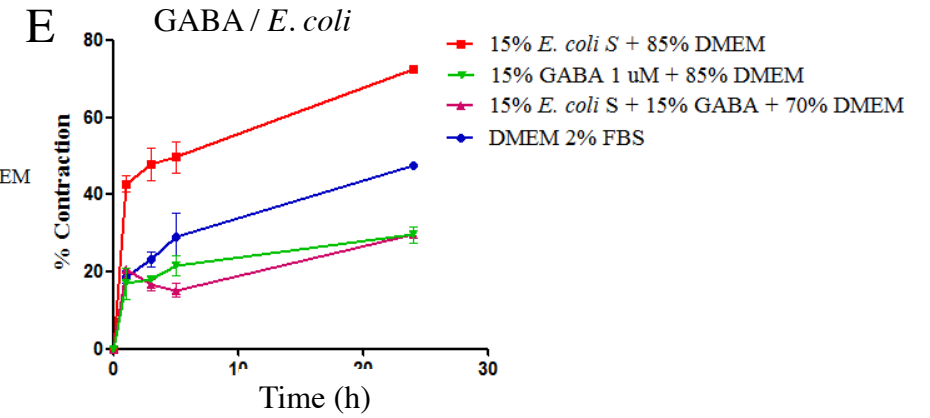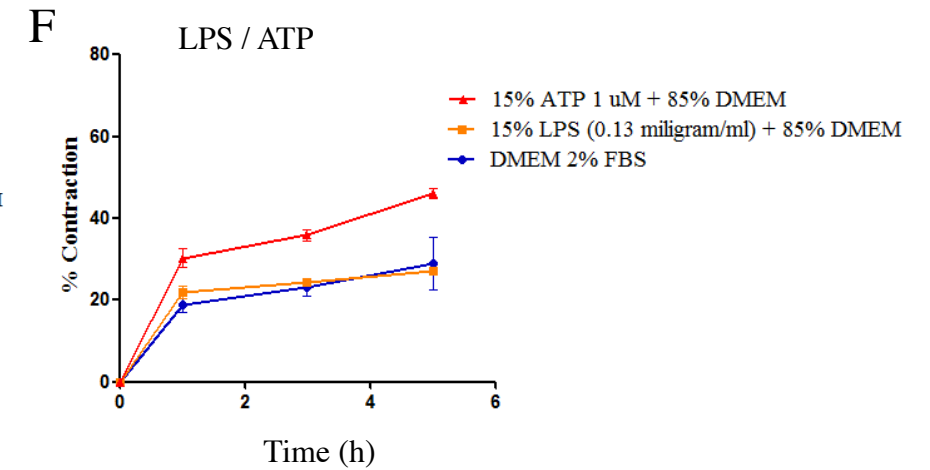

FIG7

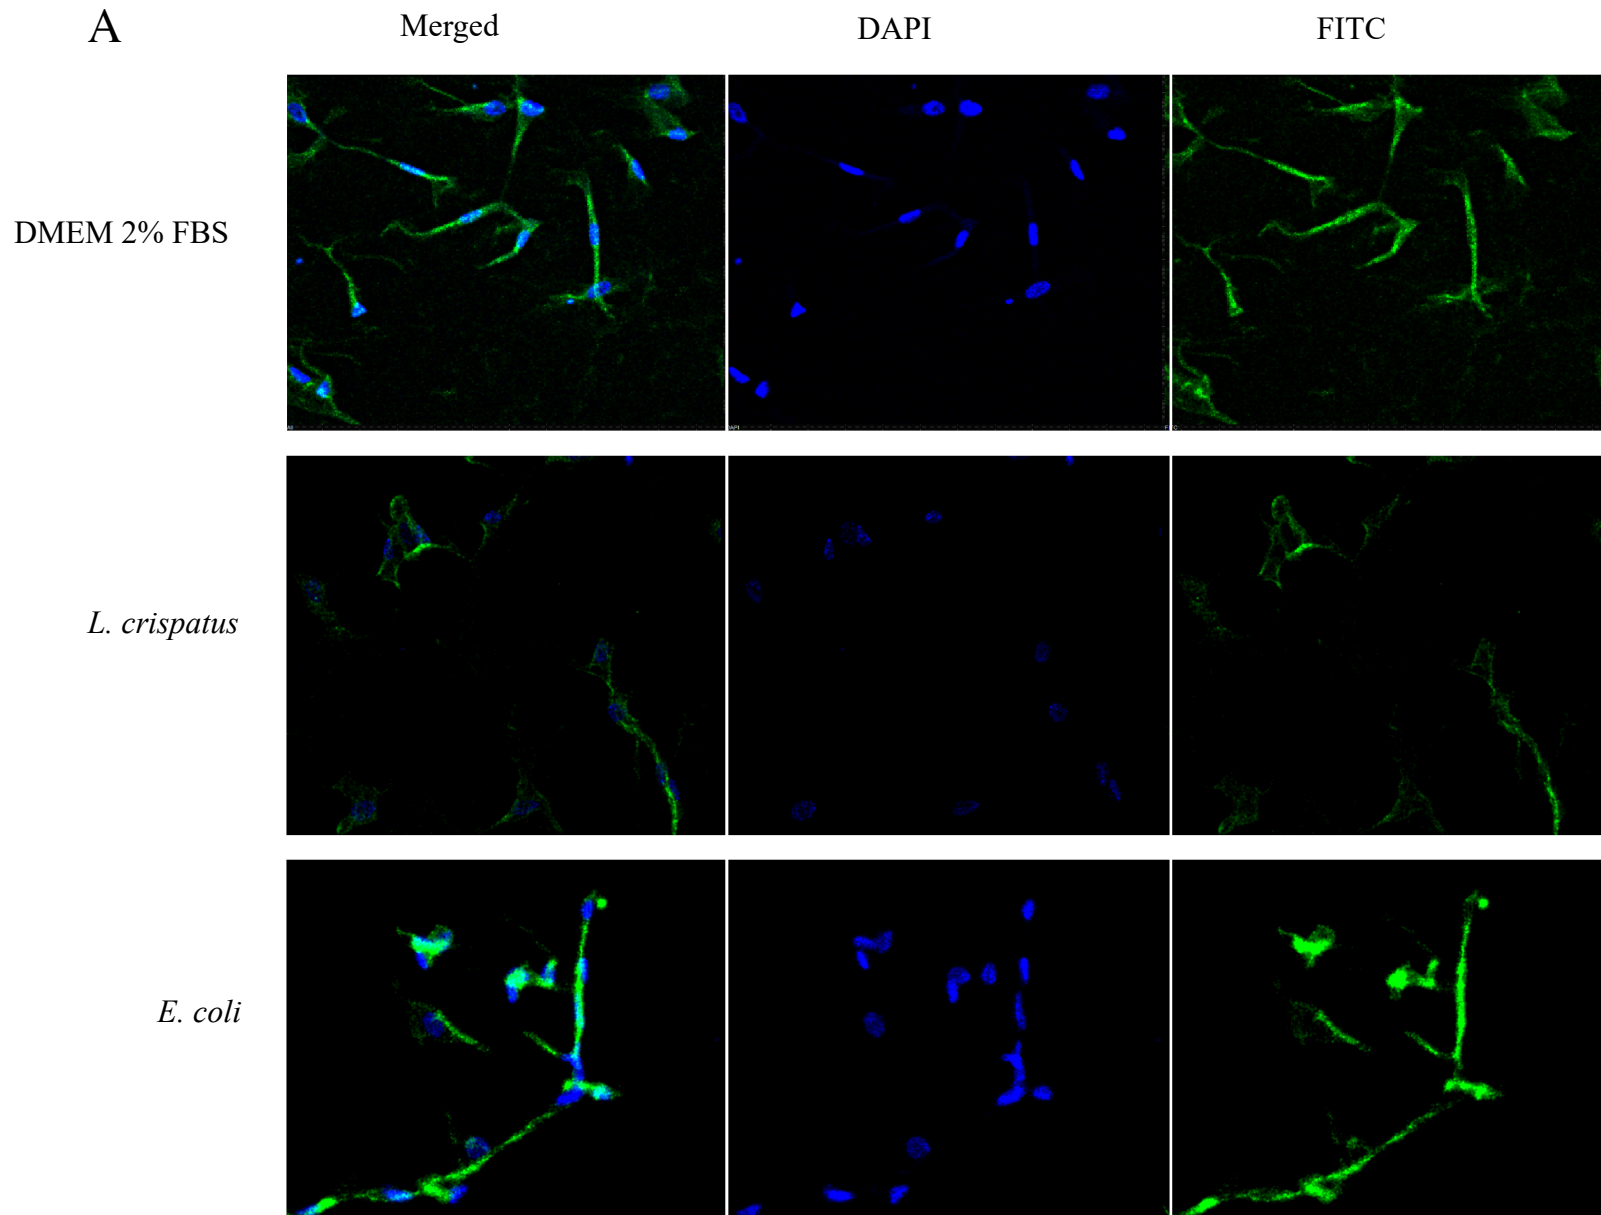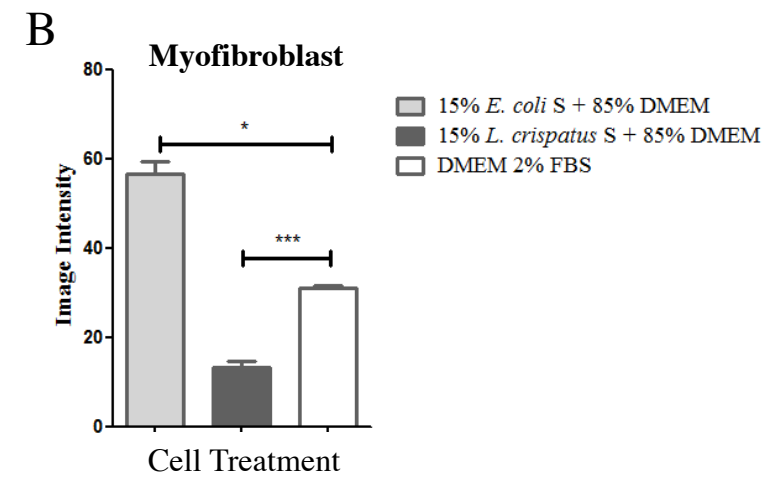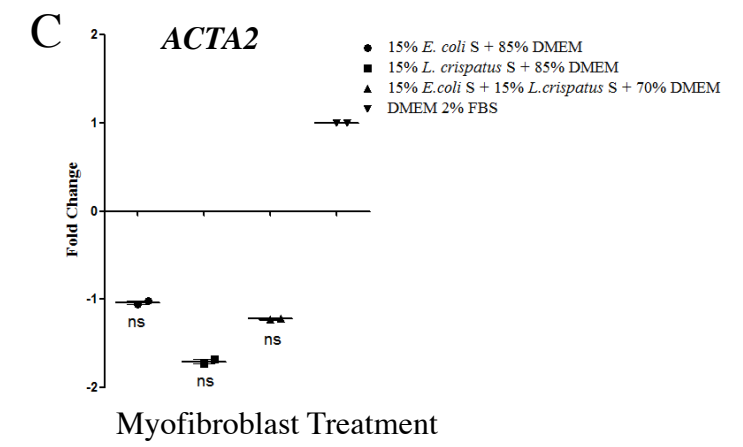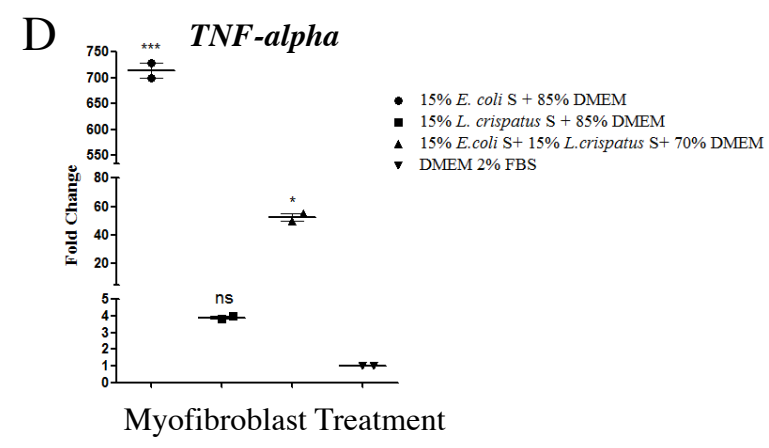

FIG8
